# Supplementary material for: The Effect of Herbal Medicinal Products on Psoriasis-Like Keratinocytes
Source: PubMed Central journal article supplement (PMC8000521; doi:10.3390/biom11030371), 2021-03-02
Supplement: biomolecules-11-00371-s001.pdf [file biomolecules-11-00371-s001.pdf]

## Supplementary Material

**Table S1:** Anti-proliferative and anti-inflammatory potential of 10 plant extracts used in folk medicines.

| Plant extract                                     | Cell viability<br>HPK, EC <sub>80</sub>           | Anti-proliferative<br>effect<br>Pso-like NHK.1, EC <sub>50</sub> | Inhibition of IL-6<br>Pso-like HPK, EC <sub>50</sub> | Inhibition of IL-8<br>Pso-like HPK, EC <sub>50</sub> |
|---------------------------------------------------|---------------------------------------------------|------------------------------------------------------------------|------------------------------------------------------|------------------------------------------------------|
| Asiatic pennywort<br>( <i>Centella asiatica</i> ) | 168.5 ± 4.33 µg/ml                                | 198.80 ± 1.71 µg/ml                                              | no anti-inflammatory<br>effect                       | 133.90 ± 1.51 µg/ml                                  |
| Brahmi<br>( <i>Bacopa monniera</i> L.)            | 84.02 ± 1.35 µg/ml                                | 158.80 ± 1.15 µg/ml                                              | 38.21 ± 1.12 µg/ml                                   | 66.36 ± 1.16 µg/ml                                   |
| Buckbean<br>( <i>Menyanthes trifoliata</i><br>L.) | 73.7 ± 4.44 µg/ml                                 | 34.75 ± 1.14 µg/ml                                               | 5.16 ± 1.75 µg/ml                                    | 6.43 ± 2.91 µg/ml                                    |
| Gentian<br>( <i>Gentiana lutea</i> )              | 187.8 ± 1.35 µg/ml                                | 229.00 ± 1.41 µg/ml                                              | no anti-inflammatory<br>effect                       | 303.60 ± 1.39 µg/ml                                  |
| Guggul<br>( <i>Commiphora mukul</i> )             | 25.83 ± 1.22 µg/ml                                | 24.97 ± 1.60 µg/ml                                               | 11.53 ± 2.32 µg/ml                                   | 14.62 ± 1.43 µg/ml                                   |
| Hop<br>( <i>Humulus lupulus</i> )                 | 0.22 ± 1.15 µg/ml                                 | 0.20 ± 1.14 µg/ml                                                | 0.38 ± 0.01 µg/ml                                    | 0.84 ± 0.14 µg/ml                                    |
| St John's wort<br>( <i>Hypericum perforatum</i> ) | 0.35 ± 1.08 µg/ml                                 | 0.69 ± 1.06 µg/ml                                                | 0.34 ± 0.23 µg/ml                                    | 0.65 ± 0.004 µg/ml                                   |
| Mango ginger<br>( <i>Curcuma amada</i> )          | 2.12 ± 1.16 µg/ml                                 | 3.95 ± 1.06 µg/ml                                                | 2.12 ± 1.09 µg/ml                                    | 2.08 ± 1.08 µg/ml                                    |
| Purple coneflower<br>( <i>Echinacea purpura</i> ) | 61.36 ± 1.18 µg/ml                                | 227.10 ± 1.98 µg/ml                                              | 55.67 ± 6.32 µg/ml                                   | 4.85 ± 1.38 µg/ml                                    |
| Sweet indraja<br>( <i>Wrightia tinctoria</i> )    | no effect on cell<br>viability<br>until 400 µg/ml | no anti-proliferative<br>effect                                  | 133.30 ± 1.08 µg/ml                                  | 124.30 µg/ml ± 1.28<br>µg/ml                         |
| <b>Controls</b>                                   |                                                   |                                                                  |                                                      |                                                      |
| Dithranol                                         | 0.03 ± 0.01 µg/ml                                 | 0.07 ± 0.19                                                      | 0.02 ± 0.001 µg/ml                                   | 0.01 ± 0.01 µg/ml                                    |

Cells were treated with the corresponding extracts in a range from 0.2 to 400 µg/mL. For cell viability tests, HPKs were incubated with the extracts for 24 h and the CellTiter-Glo2.0 Assay was performed ( $n = 3$ ). For measurement of cell proliferation, psoriasis-like immortalized HPK (iHPK) were generated from iHPK [1,2] using IL-17A, IL-22 and TNF- $\alpha$ . These cells were then treated for 24 h with the corresponding extracts ( $n = 3$ ). The IL-6 and IL-8 protein level was measured by ELISA in the supernatant of psoriasis-like HPKs after 24 h extract treatment ( $n = 3$ , technical replicates). EC<sub>50</sub> (half-maximal effective concentration) and EC<sub>80</sub> (in the cell viability assay showing 80% viable cells) were calculated using GraphPad Prism.

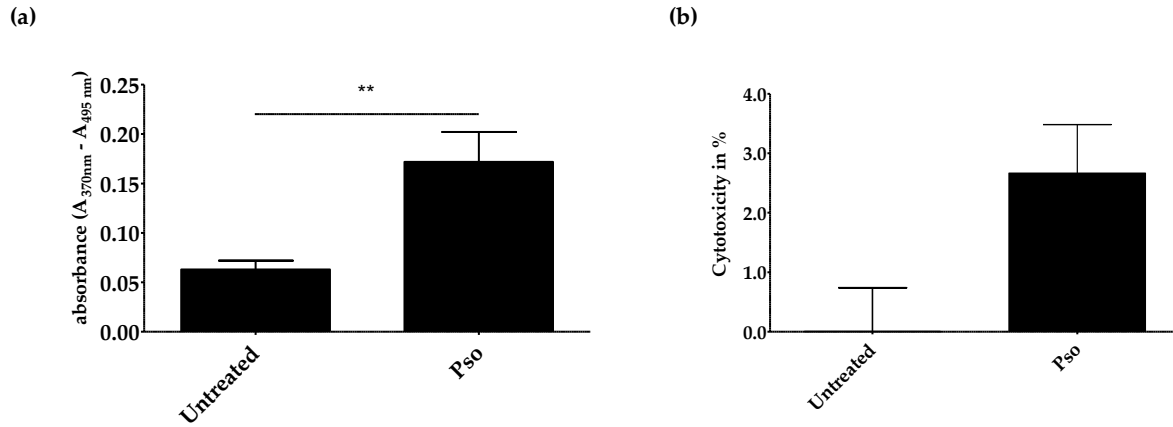

**Figure S1.** Effect of psoriasis cytokines (cytokines (IL-17, IL-22, TNF- $\alpha$ , 20 ng/mL) in HPK on cell proliferation and cell cytotoxicity. **(a)** Cell proliferation was measured in untreated HPK or psoriasis-like HPK (HPK treated with psoriasis cytokines for 72 h; Pso) with the BrdU assay ( $n = 6$ ). **(b)** Cytotoxicity was measured in the cell supernatant of untreated HPK and psoriasis-like HPK (Pso) with the LDH kit from Roche according to the manufacturer's instructions ( $n = 3$ ).

The treatment with psoriasis cytokines shows a statistically significant increase in cell proliferation with less than 4% cell toxicity, so that the cytotoxicity can be neglected.

## References

1. Sprenger, A.; Küttner, V.; Binossek, M.L.; Gretzmeier, C.; Boerries, M.; Mack, C.; Has, C.; Bruckner-Tuderman, L.; Dengjel, J. Comparative Quantitation of Proteome Alterations Induced by Aging or Immortalization in Primary Human Fibroblasts and Keratinocytes for Clinical Applications. *Mol. BioSyst.* **2010**, *6*, 1579–1582, doi:10.1039/C003962D.
2. Hawley-Nelson, P.; Vousden, K.H.; Hubbert, N.L.; Lowy, D.R.; Schiller, J.T. HPV16 E6 and E7 Proteins Cooperate to Immortalize Human Foreskin Keratinocytes. *EMBO J.* **1989**, *8*, 3905–3910.
